# Supplementary material for: Selenium Hyperaccumulator Plants Stanleya pinnata and Astragalus bisulcatus Are Colonized by Se-Resistant, Se-Excluding Wasp and Beetle Seed Herbivores
Source: PubMed Central journal article supplement (PMC3513300; doi:10.1371/journal.pone.0050516), 2012-12-03
Supplement: pone.0050516.s002.pdf [file pone.0050516.s002.pdf]

Project Selenium 23

Sample: Sample 3 Site of interest 1

ID: Astragalus bisulcatus mature seed (air dried, sectioned and Carbon coated)

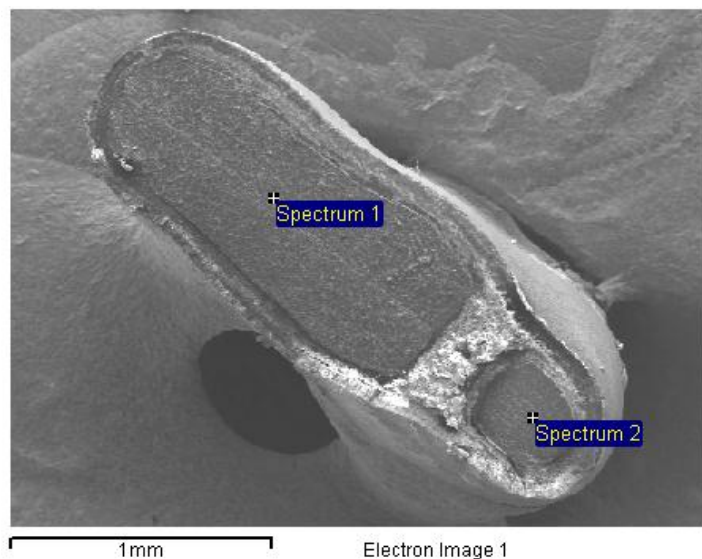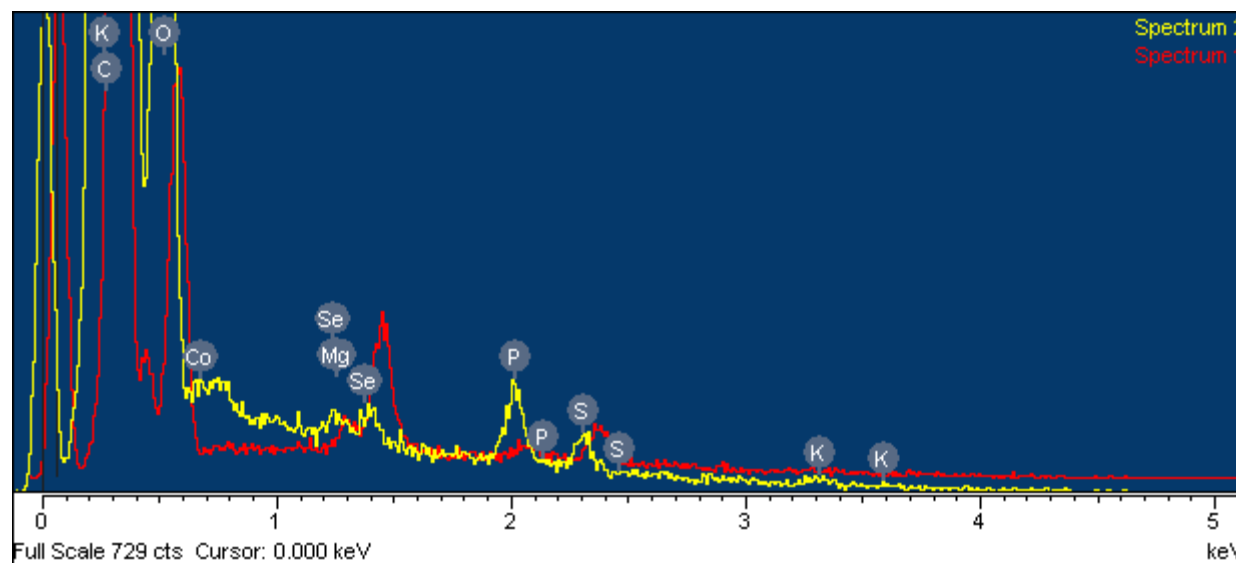

Processing option : All elements analysed (Normalised)

| Spectrum   | In stats. | O     | Mg   | P     | S     | K    | Co   | Se    | Total  |
|------------|-----------|-------|------|-------|-------|------|------|-------|--------|
| Spectrum 1 | Yes       | 46.66 | 2.76 | 3.41  | 15.51 |      |      | 31.67 | 100.00 |
| Spectrum 2 | Yes       | 68.26 | 1.33 | 10.79 | 6.46  | 5.88 | 3.80 | 3.46  | 100.00 |
| Max.       |           | 68.26 | 2.76 | 10.79 | 15.51 | 5.88 | 3.80 | 31.67 |        |
| Min.       |           | 46.66 | 1.33 | 3.41  | 6.46  | 0.00 | 0.00 | 3.46  |        |

All results in weight%

Project Selenium 22

Sample: 3 Site of interest 7

ID: Astragalus bisulcatus mature seed. (air dried, sectioned and Carbon coated)

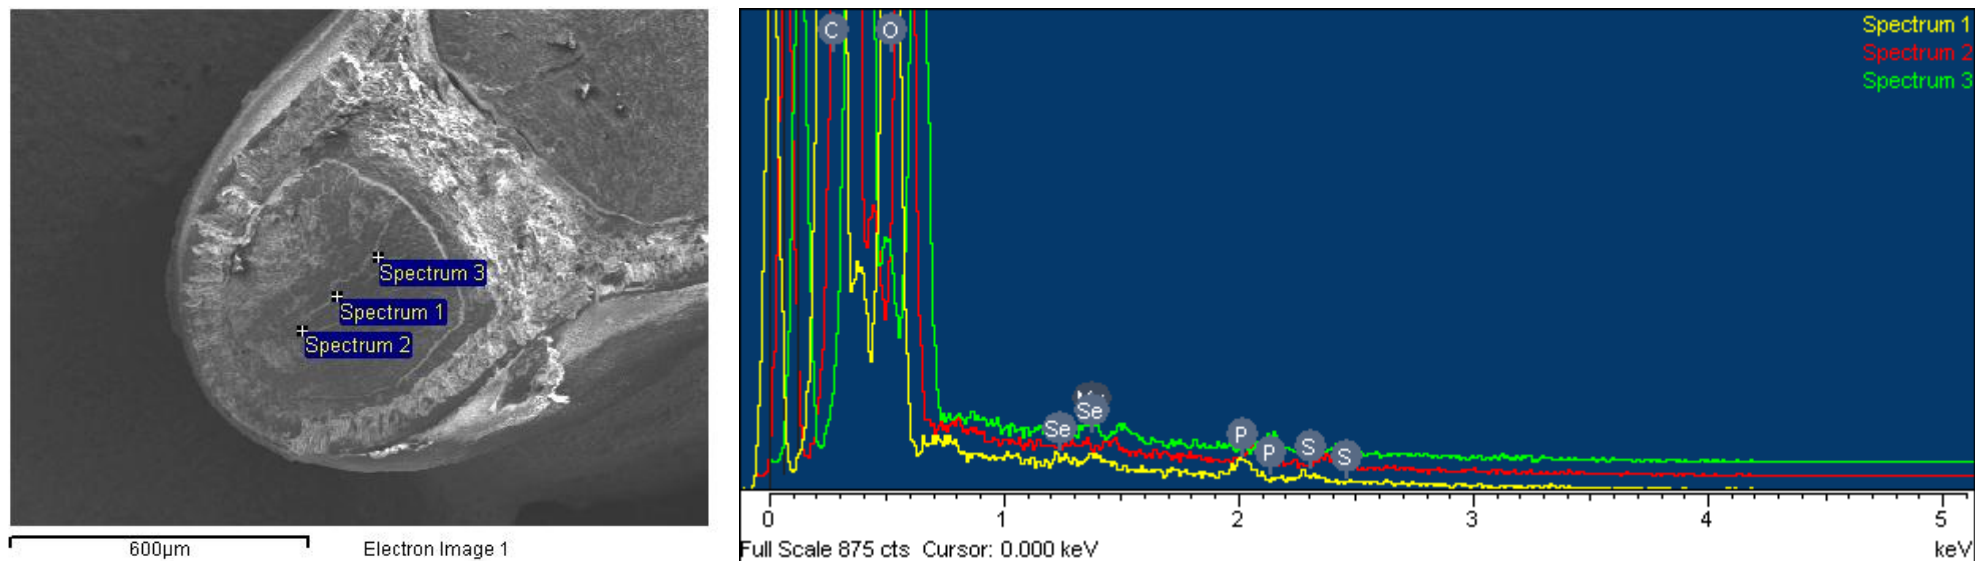

Processing option : All elements analysed (Normalised)

| Spectrum   | In stats. | O     | Mg   | P    | S    | Se   | Total  |
|------------|-----------|-------|------|------|------|------|--------|
| Spectrum 1 | Yes       | 89.26 |      | 5.86 | 2.72 | 2.17 | 100.00 |
| Spectrum 2 | Yes       | 88.38 |      | 5.69 | 3.52 | 2.41 | 100.00 |
| Spectrum 3 | Yes       | 83.25 | 2.09 | 6.38 | 3.29 | 4.98 | 100.00 |
| Max.       |           | 89.26 | 2.09 | 6.38 | 3.52 | 4.98 |        |
| Min.       |           | 83.25 | 0.00 | 5.69 | 2.72 | 2.17 |        |

All results in weight%

Project Selenium 22

Sample: 3 Site of interest 6

ID: Astragalus bisulcatus mature seed. (air dried, sectioned and Carbon coated)

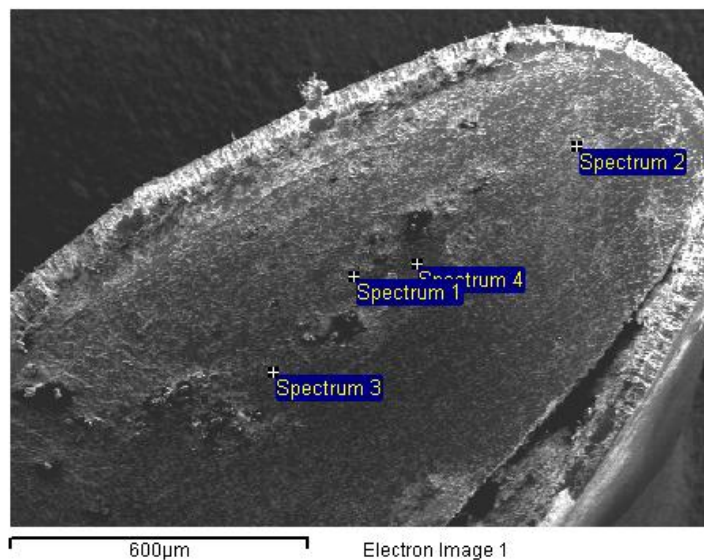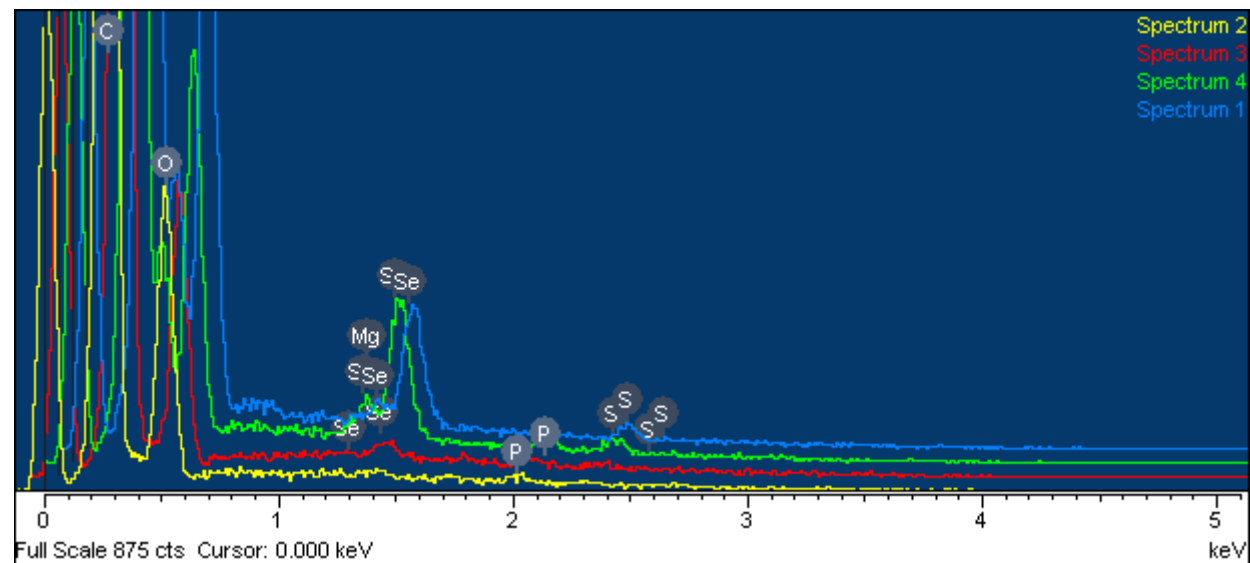

Processing option : All elements analysed (Normalised)

| Spectrum   | In stats. | O     | Mg   | P    | S    | Se    | Total  |
|------------|-----------|-------|------|------|------|-------|--------|
| Spectrum 1 | Yes       | 66.12 |      |      | 6.17 | 27.71 | 100.00 |
| Spectrum 2 | Yes       | 92.69 |      | 7.31 |      |       | 100.00 |
| Spectrum 3 | Yes       | 83.61 |      | 6.18 |      | 10.21 | 100.00 |
| Spectrum 4 | Yes       | 46.13 | 4.12 | 5.62 | 6.30 | 37.83 | 100.00 |
| Max.       |           | 92.69 | 4.12 | 7.31 | 6.30 | 37.83 |        |
| Min.       |           | 46.13 | 0.00 | 0.00 | 0.00 | 0.00  |        |

All results in weight%

Project Selenium 24  
 Sample: Sample 3 (green seed) Site of interest 1  
 ID: Astragalus bisulcatus green seed (cryo stage fractured Au coated)

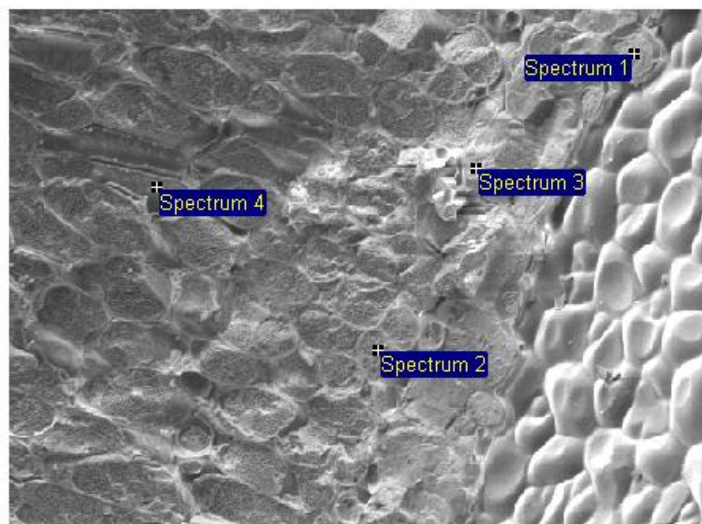

Electron Image 1

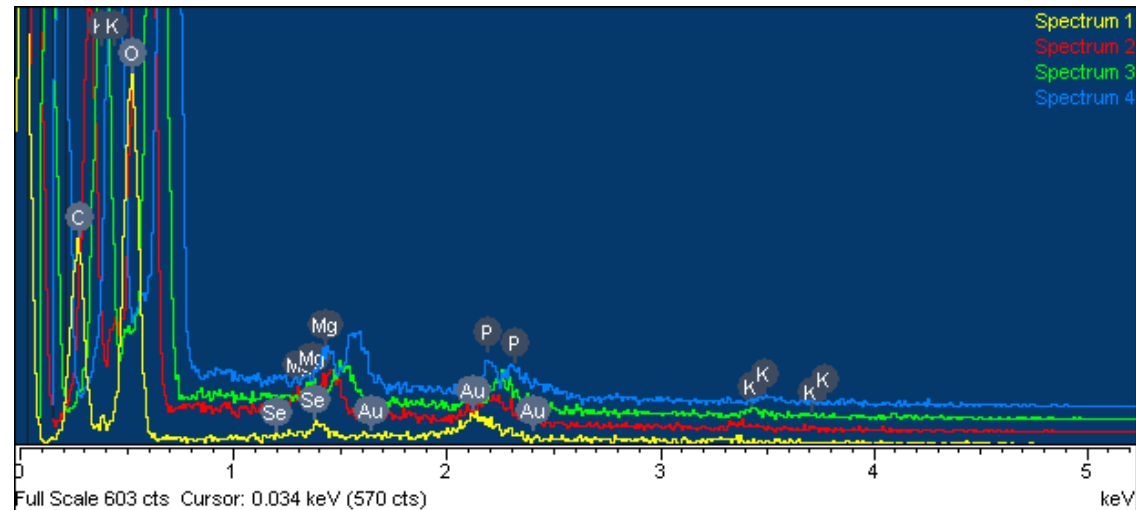

Processing option : All elements analysed (Normalised)

| Spectrum   | In stats. | C     | O     | Mg   | P    | K    | Se   | Total  |
|------------|-----------|-------|-------|------|------|------|------|--------|
| Spectrum 1 | Yes       | 32.97 | 64.25 |      |      |      | 2.78 | 100.00 |
| Spectrum 2 | Yes       | 17.13 | 79.43 | 0.50 |      |      | 2.94 | 100.00 |
| Spectrum 3 | Yes       | 23.87 | 68.72 | 0.43 |      | 4.39 | 2.59 | 100.00 |
| Spectrum 4 | Yes       | 22.01 | 69.43 | 0.88 | 1.59 | 2.96 | 3.13 | 100.00 |
| Max.       |           | 32.97 | 79.43 | 0.88 | 1.59 | 4.39 | 3.13 |        |
| Min.       |           | 17.13 | 64.25 | 0.00 | 0.00 | 0.00 | 2.59 |        |

All results in weight%

# Project Selenium 24

Sample 3 SOI 3 Astragalus bis. green seed. Cryo Fractured seed case in and Au coated

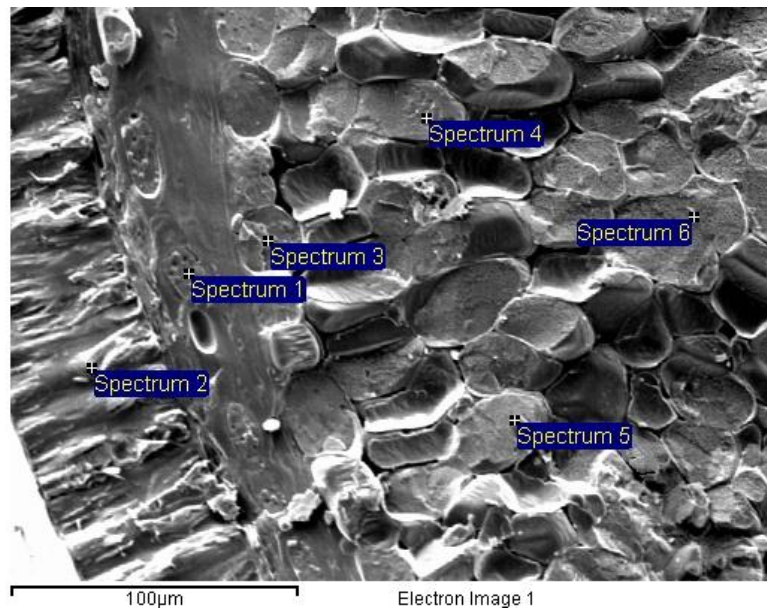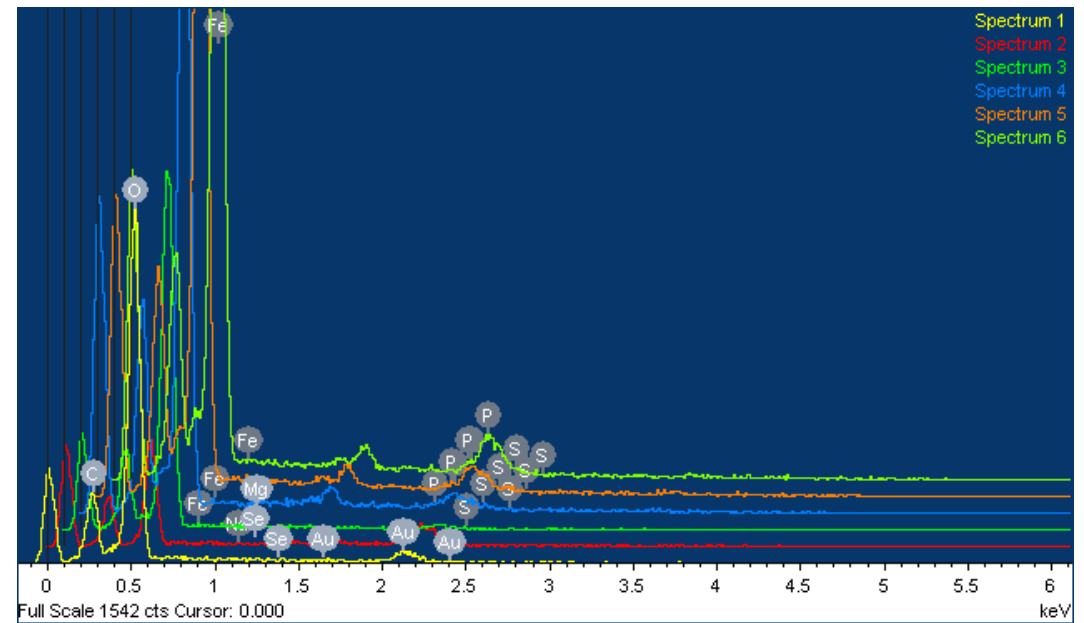

Processing option : All elements analysed (Normalised)

| Spectrum   | In stats. | C     | O     | Na   | Mg   | P    | S    | Fe   | Se   | Total  |
|------------|-----------|-------|-------|------|------|------|------|------|------|--------|
| Spectrum 1 | Yes       | 16.75 | 82.55 |      | 0.18 |      |      |      | 0.52 | 100.00 |
| Spectrum 2 | Yes       | 30.55 | 67.61 | 0.46 |      |      |      |      | 1.38 | 100.00 |
| Spectrum 3 | Yes       | 17.22 | 80.65 |      |      |      | 0.43 | 1.24 | 0.45 | 100.00 |
| Spectrum 4 | Yes       | 20.38 | 74.61 |      | 0.33 | 0.32 | 0.73 | 0.96 | 2.66 | 100.00 |
| Spectrum 5 | Yes       | 15.30 | 80.56 |      | 0.36 | 0.50 | 0.44 | 0.48 | 2.36 | 100.00 |
| Spectrum 6 | Yes       | 17.23 | 76.88 |      | 0.48 | 0.88 | 0.82 | 0.87 | 2.84 | 100.00 |
| Max.       |           | 30.55 | 82.55 | 0.46 | 0.48 | 0.88 | 0.82 | 1.24 | 2.84 |        |
| Min.       |           | 15.30 | 67.61 | 0.46 | 0.18 | 0.32 | 0.43 | 0.48 | 0.45 |        |

All results in weight%

Project Selenium 25  
 Sample: Sample 6 Site of interest 3 fractured surface of the seed testa  
 ID: Astragalus bisulcatus fruit pods and seed (cryo stage fractured Au coated)

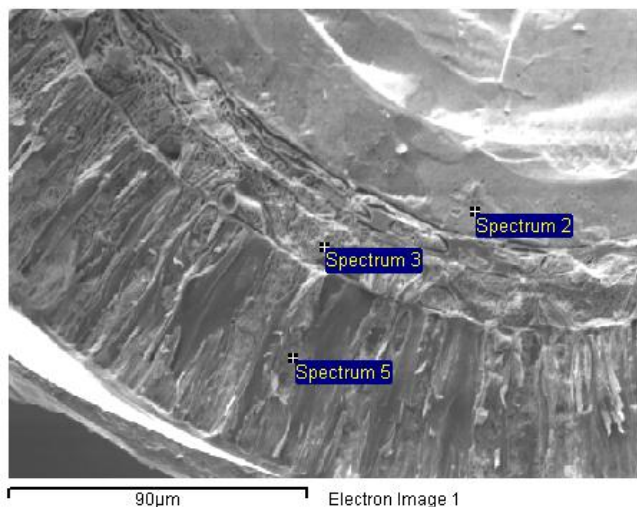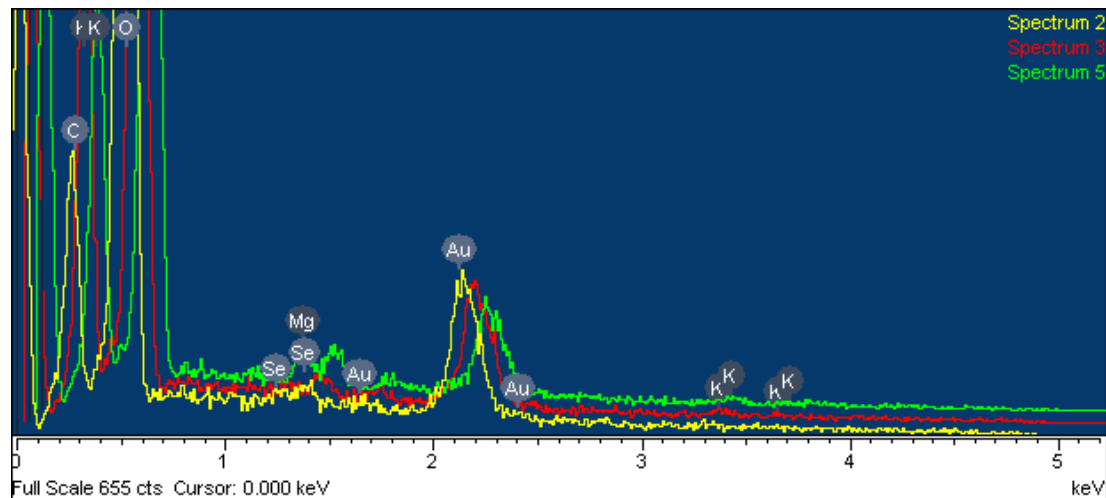

Processing option : All elements analysed (Normalised)

| Spectrum     | In stats. | C     | O     | Mg   | K    | Fe   | Se   | Total  |
|--------------|-----------|-------|-------|------|------|------|------|--------|
| Sum Spectrum | Yes       | 30.44 | 67.07 | 0.26 |      | 1.60 | 0.63 | 100.00 |
| Spectrum 2   | Yes       | 10.54 | 88.44 |      |      |      | 1.02 | 100.00 |
| Spectrum 3   | Yes       | 22.25 | 72.93 |      | 3.62 |      | 1.21 | 100.00 |
| Spectrum 4   | Yes       | 21.12 | 77.82 |      |      |      | 1.05 | 100.00 |
| Spectrum 5   | Yes       | 16.69 | 75.42 | 1.32 | 4.00 |      | 2.57 | 100.00 |
| Max.         |           | 30.44 | 88.44 | 1.32 | 4.00 | 1.60 | 2.57 |        |
| Min.         |           | 10.54 | 67.07 | 0.00 | 0.00 | 0.00 | 0.63 |        |

All results in weight%

Project Selenium 23

Sample 4 SOI 1 *Stanleya pinnata* mature seed. Air dried sectioned and Carbon coated

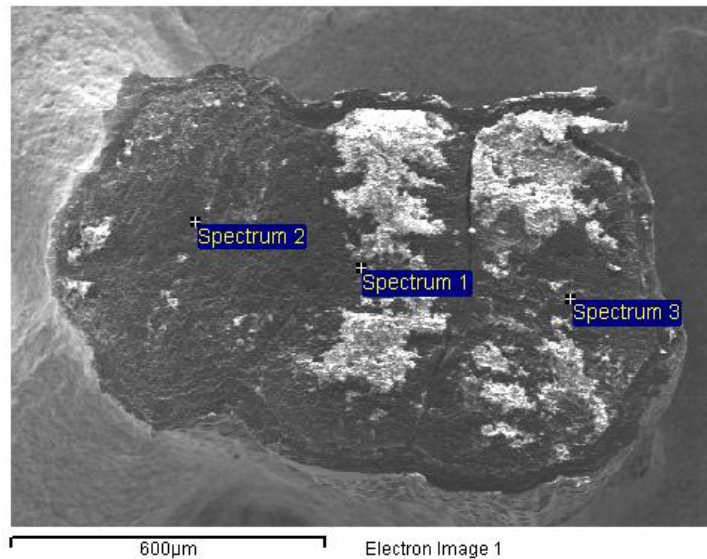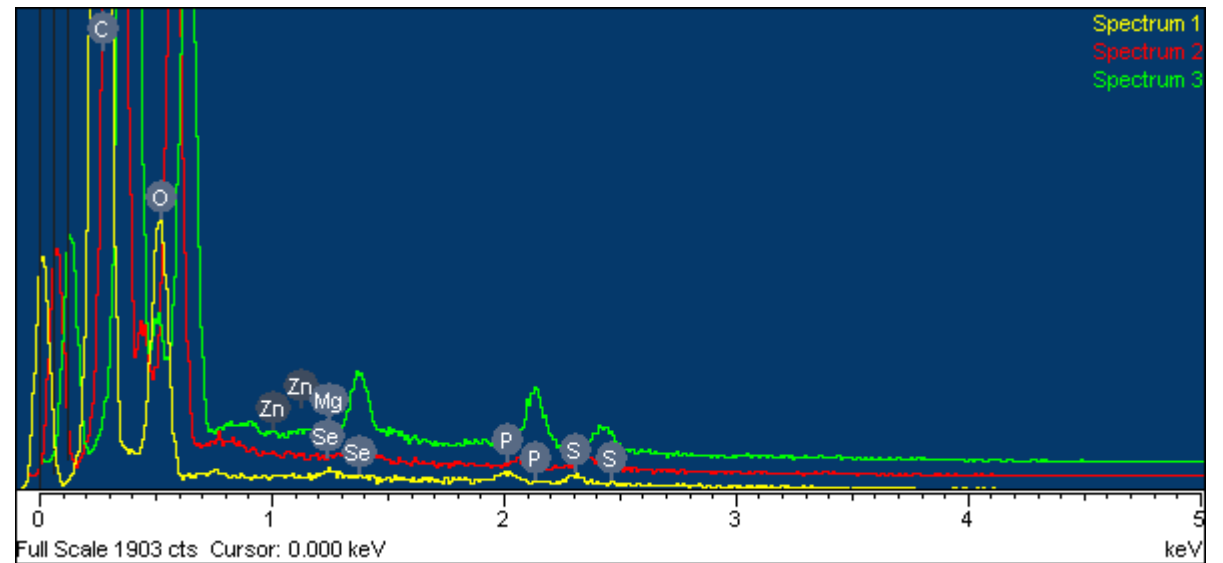

Processing option : All elements analysed (Normalised)

| Spectrum   | In stats. | O     | Mg   | P     | S     | Zn   | Se   | Total  |
|------------|-----------|-------|------|-------|-------|------|------|--------|
| Spectrum 1 | Yes       | 78.63 | 2.26 | 7.35  | 9.40  |      | 2.36 | 100.00 |
| Spectrum 2 | Yes       | 87.67 | 1.00 | 3.75  | 6.79  |      | 0.79 | 100.00 |
| Spectrum 3 | Yes       | 61.35 | 7.62 | 17.40 | 10.39 | 1.36 | 1.89 | 100.00 |
| Max.       |           | 87.67 | 7.62 | 17.40 | 10.39 | 1.36 | 2.36 |        |
| Min.       |           | 61.35 | 1.00 | 3.75  | 6.79  | 0.00 | 0.79 |        |

All results in weight%

Project Selenium 25

Sample 5 SOI 2 Stanleya pinnata green seed. Cryo coated Au

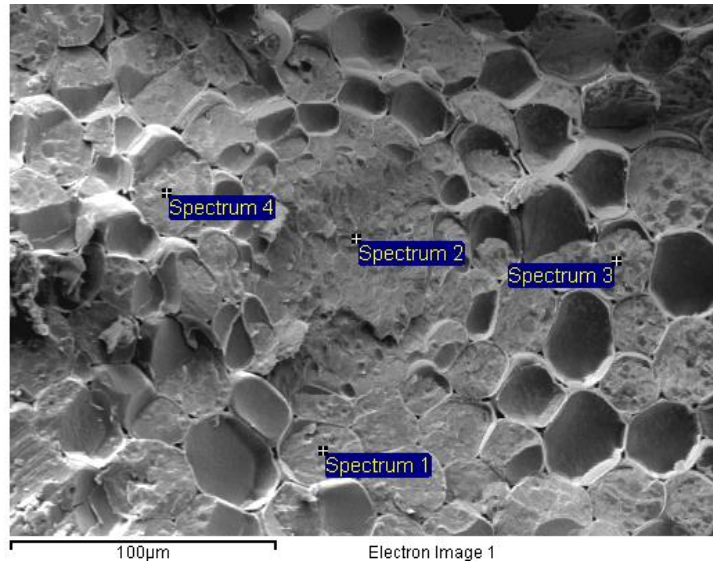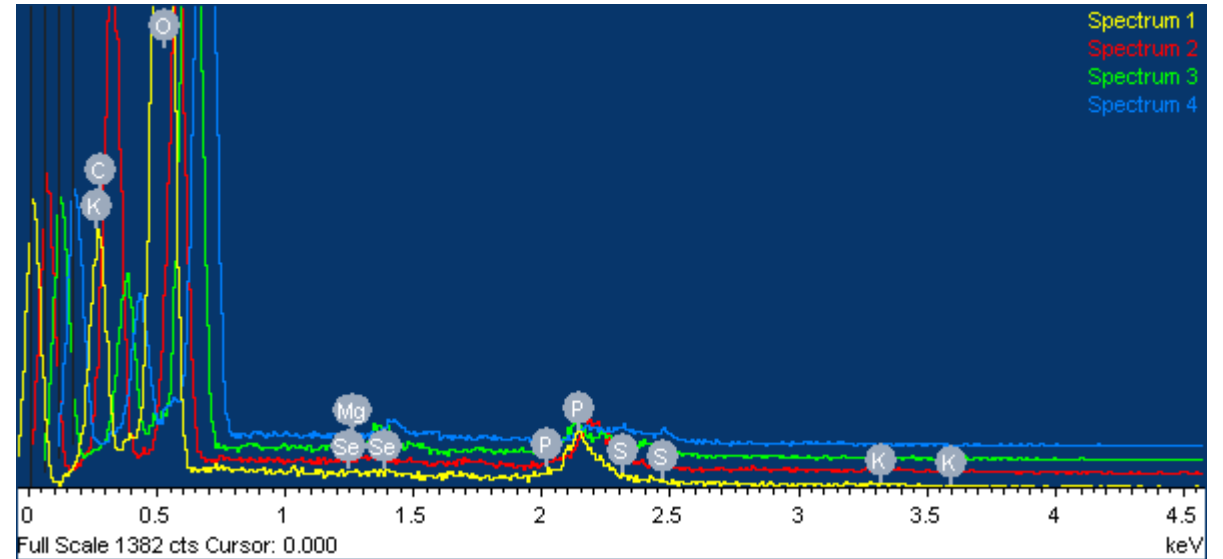

Processing option : All elements analysed (Normalised)

| Spectrum       | In stats. | C     | O     | Mg   | P    | S    | K    | Se   | Total  |
|----------------|-----------|-------|-------|------|------|------|------|------|--------|
| Spectrum 1     | Yes       | 16.13 | 80.12 | 0.09 | 0.40 | 1.08 | 1.71 | 0.46 | 100.00 |
| Spectrum 2     | Yes       | 44.66 | 49.79 | 0.19 | 0.76 | 1.44 | 3.05 | 0.12 | 100.00 |
| Spectrum 3     | Yes       | 15.00 | 75.71 | 1.48 | 4.26 | 2.41 | 0.26 | 0.88 | 100.00 |
| Spectrum 4     | Yes       | 11.80 | 80.61 | 1.10 | 2.32 | 2.57 | 0.79 | 0.80 | 100.00 |
| Mean           |           | 21.90 | 71.56 | 0.72 | 1.93 | 1.88 | 1.45 | 0.56 | 100.00 |
| Std. deviation |           | 15.28 | 14.68 | 0.68 | 1.76 | 0.73 | 1.22 | 0.35 |        |
| Max.           |           | 44.66 | 80.61 | 1.48 | 4.26 | 2.57 | 3.05 | 0.88 |        |
| Min.           |           | 11.80 | 49.79 | 0.09 | 0.40 | 1.08 | 0.26 | 0.12 |        |

All results in weight%



Comment: Bruchid beetle adult abdomen posterior Cryo planed Au coated

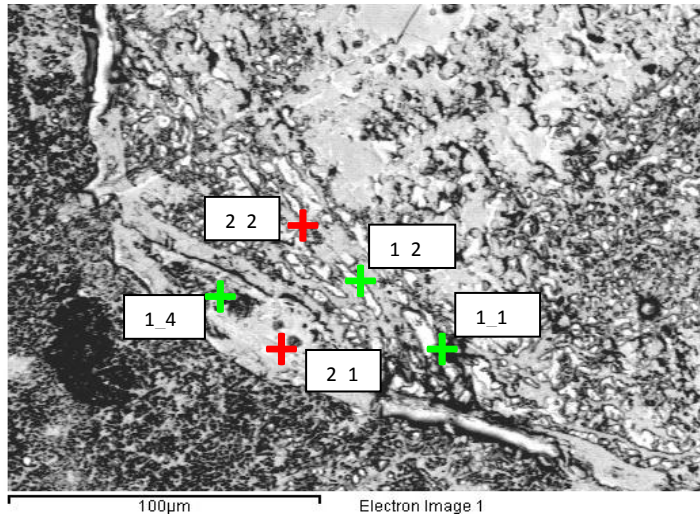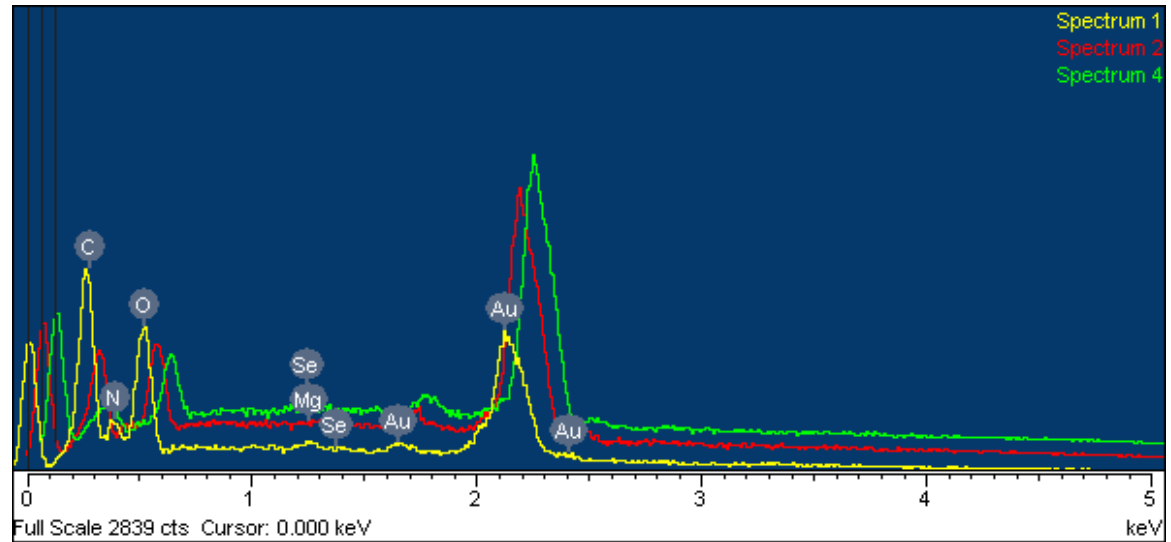

Processing option : All elements analysed (Normalised)

| Spectrum   | In stats. | C     | O     | Mg   | P     | S     | Se   | Total  |
|------------|-----------|-------|-------|------|-------|-------|------|--------|
| Spectrum 1 | Yes       | 44.84 | 36.59 | 1.91 | 10.59 | 4.91  | 1.15 | 100.00 |
| Spectrum 2 | Yes       | 38.19 | 57.75 | 2.20 |       |       | 1.86 | 100.00 |
| Spectrum 4 | Yes       | 18.16 | 79.36 | 0.82 |       |       | 1.66 | 100.00 |
| Spectrum 1 | Yes       | 62.83 | 18.66 | 1.50 |       | 15.89 | 1.12 | 100.00 |
| Spectrum 2 | Yes       | 48.86 | 44.00 | 1.93 |       | 3.77  | 1.45 | 100.00 |
| Max        |           | 62.83 | 79.36 | 1.93 | 10.59 | 15.89 | 1.86 |        |
| Min.       |           | 18.16 | 18.66 | 0.82 | 10.59 | 3.77  | 1.12 |        |

All results in weight%
